# Supplementary material for: The Effects of Bimanual Coordination in Music Interventions on Executive Functions in Aging Adults
Source: PubMed Central journal article supplement (PMC6906951; doi:10.3389/fnint.2019.00068), 2019-12-05
Supplement: Data_Sheet_1.pdf [file Data_Sheet_1.pdf]

| <b>Group Piano Instruction (GPI) Course</b> | <b>Piece/Exercise/Scales</b>                                                                                                                | <b>Pieces to Master</b>                                                                                         | <b>Theory</b>                               |
|---------------------------------------------|---------------------------------------------------------------------------------------------------------------------------------------------|-----------------------------------------------------------------------------------------------------------------|---------------------------------------------|
| Week 1                                      | Find Notes pg. 9<br>Play pages 12-21<br>C Position<br>C Major Scale<br>(1 octave- Hands Separate)                                           | Ode to Joy<br>Aura Lee<br>Rock Along<br>Mexican Hat Dance                                                       | Schaum pg 3-9<br>Alfred pg. 14-15,<br>18-19 |
| Week 2                                      | Melodic/Harmonic Intervals<br>Play pgs. 24, 26, 28<br>C Major Scale (1 octave, Hands Together)<br>G Major Scale (1 octave, Hands Separate)  | Au Claire de Lune<br>Tisket, A Tasket<br>Rockin Intervals                                                       | Schaum pg. 10-13<br>Alfred pg. 25, 27       |
| Week 3                                      | Melodic/Harmonic 4 <sup>th</sup> & 5 <sup>th</sup><br>Play pgs 28, 30<br>D Major Scale- Hands Separate<br>G Major – Hands Together          | Good King Wenceslas<br>My Fifth<br>Jingle Bells                                                                 | Schaum pg. 17, 18<br>Alfred pg. 29, 31      |
| Week 4                                      | Chords C and G7<br>Play pgs. 33, 35, 37<br>A Major Scale- Hands Separate<br>D Major – Hands Together                                        | Brother John<br>Here's A Happy Song<br>Merrily We Roll<br>Largo                                                 | Schaum pg 14, 15, 19<br>Alfred pg. 38, 39   |
| Week 5                                      | Ties and Slurs<br>Play pgs 37, 40, 42, 43<br>E Major Scale- Hands Separate<br>A Major – Hands Together                                      | Mary Ann<br>Rockets<br>What Can I Share?<br>Day is Done                                                         | Schaum pg. 20, 21, 22<br>Alfred pg. 41, 43  |
| Week 6                                      | F Major Chord, G Position<br>Play pgs 45, 47, 48, 49, 51<br>B Major Scale- Hands Separate<br>E Major – Hands Together                       | When the Saints (pg. 45)<br>When the Saints (pg. 47)<br>Love Somebody<br>A Friend Like You                      | Schaum pg. 23, 24, 25<br>Alfred pg. 52, 53  |
| Week 7                                      | Block and Broken Chords<br>Play pgs. 54, 56, 59, 61<br>F# Major Scale- Hands Separate<br>B Major – Hands Together                           | Money Can't Buy Everything<br>Cuckoo<br>Harp Song<br>Leschetizky Solution                                       | Schaum pg. 26, 27<br>Alfred pg. 55, 62, 63  |
| Week 8                                      | Middle C Position<br>Block and Broken Chords<br>Play pgs. 62, 65, 69, 72, 73<br>C# Major Scale- Hands Separate<br>F# Major – Hands Together | Liza Jane<br>Beautiful Brown Eyes<br>Alpine Melody<br>Exercise on pg. 71<br>Waltz Time<br>Review Scales C, G, D | Schaum pg. 28, 29<br>Alfred pg. 66, 70, 71  |
| Week 9                                      | Eighth Notes/ Block Chords<br>Play pgs. 75, 76, 77, 78<br>F Major Scale- Hands Separate<br>C# Major – Hands Together                        | Happy Birthday To You<br>Shoo Fly, Shoo!/Skip to My Lou!/Standing in the Need of Prayer<br>Hanon #1             | Alfred pg. 76<br>Harmonization chords       |

| <b>Group Piano Instruction (GPI) Course</b> | <b>Piece/Exercise/Scales</b>                                                                                                                                                                   | <b>Pieces to Master</b>                                                                                               | <b>Theory</b>                 |
|---------------------------------------------|------------------------------------------------------------------------------------------------------------------------------------------------------------------------------------------------|-----------------------------------------------------------------------------------------------------------------------|-------------------------------|
| Week 10                                     | Dotted Quarter Notes<br>Interval of 6ths<br>Play pgs. 79, 82, 84, 85, 88<br>Bb Major Scale- Hands Separate<br>F Major – Hands Together                                                         | Alouette<br>Lavender's Blue<br>Kum-ba-yah<br>London Bridge<br>Michael Row<br>Hanon #2                                 | Alfred pg. 86                 |
| Week 11                                     | Playing 6 <sup>th</sup> /7ths<br>Play pgs. 87, 89, 90-91, 94,<br>Eb Major Scale- Hands Separate<br>Bb Major – Hands Together                                                                   | Blow the Man Down<br>Lone Star Waltz<br>Café Vienna<br>Hanon #6                                                       | Alfred pg. 93                 |
| Week 12                                     | Accidentals (Flats)<br>Chordal Movements (Planing)<br>Play pgs. 95, 96, 103, 105<br><br>Ab Major Scale- Hands Separate<br>Eb Major – Hands Together                                            | Lullaby<br>Rock It Away<br>Joy to the World<br>Cockles and Mussels                                                    | Alfred pg. 97, 98,<br>99, 101 |
| Week 13                                     | Review of C Position and G<br>Position with Accidentals<br><br>Play pgs. 107, 108, 109, 110, 113,<br>115, 116<br>Db Major Scale- Hands<br>Separate/Hands Together<br>Ab Major – Hands Together | Got Those Blues<br>Blues for Wynton Marsalis<br>On Top of Old Smokey<br>Can Can<br>Marine's Hymn<br>Why Am I So Blue? | Alfred pg. 114                |
| Week 14                                     | F Major Scale Pieces<br>Play pgs. 119, 120-121, 123, 124-<br>125                                                                                                                               | Little Brown Jug<br>Chiapanecas<br>Auld Lang Syne<br>O Sole Mio                                                       | Alfred pg. 122                |
| Week 15                                     | Play pgs., 127, 130-131, 133, 135<br>A minor – All three forms – hands<br>separate and hands together                                                                                          | Jericho<br>Greensleeves<br>Go Down Moses<br>Scarborough Fair                                                          | Alfred pg. 128                |
| Week 16                                     | Play pgs: 136, 138-139, 140-141,<br>142-143<br>Review All Major Scales<br>D minor scale – All three forms –<br>hands separate and hands<br>together                                            | Raisins and Almonds<br>Entertainer<br>He's Got the Whole World<br>Amazing Grace                                       |                               |

| <b>Group Percussion Instruction (GPel) Course</b> | <b>Piece/Exercise/Scales Note: Mallets played some scales, broken octave scales to alternate mallet work each week.</b> | <b>Pieces to Master</b>                                                                                               | <b>Theory</b>                                        |
|---------------------------------------------------|-------------------------------------------------------------------------------------------------------------------------|-----------------------------------------------------------------------------------------------------------------------|------------------------------------------------------|
| Week 1                                            | Find Notes,<br>C Major Scale<br>Murray -Ostinato Exercises                                                              | Ode to Joy<br>Aura Lee<br>Balafon                                                                                     | Schaum pg 3-9<br>Scales<br>Ostinati Patterns         |
| Week 2                                            | C Major Scale<br>G Major Scale<br>Murray Ostinato Exercises                                                             | Balafon (Hot Marimba)<br>Two Three (Hot Marimba)                                                                      | Schaum pg. 10-13<br>Scales<br>Ostinati Patterns      |
| Week 3                                            | Eighth-Notes<br>D Major Scale<br>G Major                                                                                | Brother John (Traditional)<br>Mbira Jam(Hot Marimba)<br>Two Three(Hot Marimba)                                        | Schaum pg. 17, 18<br>Scales<br>Ostinati Patterns     |
| Week 4                                            | Dotted Notes/ Mallet Alternate<br>Murray Ostinato Exercises<br>Review Scales C, G, D,<br>F Major - New                  | Hoom Bah (Hot Marimba)<br>Crunchy (Hot Marimba)<br>Linstead Market (Get America Singing)                              | Schaum pg 14, 15, 19<br>Scales<br>Ostinati Patterns  |
| Week 5                                            | 6/8 Meter<br>Murray Ostinato Exercises                                                                                  | Nyoka (Hot Marimba)<br>Rip! (Hot Marimba)                                                                             | Schaum pg. 20, 21, 22<br>Scales<br>Ostinati Patterns |
| Week 6                                            | 4/4 Meter and Syncopation<br>Murray Ostinato Exercises<br>F Major<br>G Major<br>Broken Octaves                          | Linstead Market (Review)<br>Rocka My Soul (Get America Singing)<br>Swing Low Sweet Chariot                            | Schaum pg. 23, 24, 25<br>Scales<br>Ostinati Patterns |
| Week 7                                            | Melodies in Different Keys<br>Murray Ostinato Exercises<br>Mallet exercises in the Murray<br>Eighth Notes               | He's Got the Whole World in His Hands<br>Happy Birthday to You<br>Review Parts of Balfon, Crunchy,<br>Linstead Market | Schaum pg. 26, 27<br>Scales<br>Ostinati Patterns     |
| Week 8                                            | F Major<br>Dotted Rhythms<br>Murray Ostinato Exercises<br>Mallet exercises in the Murray                                | Auld Lang Syne<br>Chiapanecas<br>Swing Low Sweet Chariot                                                              | Schaum pg. 28, 29<br>Scales<br>Ostinati Patterns     |
| Week 9                                            | Dynamics on Mallets<br>Murray Ostinato Exercises<br>Mallet exercises in the Murray<br>Question/Answer Improvisation     | All Through the Night<br>Crunchy<br>Balafon<br>Rip!                                                                   | Ostinati Patterns<br>Rhythm Exercises                |

|                                    |                                                                                                         |                                                                                                                                  |                                                 |
|------------------------------------|---------------------------------------------------------------------------------------------------------|----------------------------------------------------------------------------------------------------------------------------------|-------------------------------------------------|
| Week 10                            | Scales in 3rds with mallets<br>Murray Ostinato Exercises with Harmony<br>Mallet exercises in the Murray | Balafon (Hot Marimba)<br>Crunchy(Hot Marimba)<br>Rip! (Hot Marimba)<br>He's Got the Whole World                                  | Ostinati Patterns<br>Rhythm Exercises           |
| Week 11                            | Scales in 6ths with mallets<br>Murray Ostinato Exercises<br>Mallet exercises in the Murray              | Alouette (Traditional Folk)<br>Two Three (Hot Marimba)<br>Down in the Valley (Get America Singing)                               | Ostinati Patterns<br>Rhythm Exercises           |
| Week 12                            | Rhythmic Accuracy<br>Murray Ostinato Exercises<br>Improvisation Question/Answer                         | Balafon (Hot Marimba)<br>Crunchy(Hot Marimba)<br>Rip! (Hot Marimba)<br>Linstead Market                                           | Ostinati Patterns<br>Rhythm Exercises           |
| Week 13                            | Eighth notes and Mallet Technique<br>Murray Ostinato Exercises<br>Improvisation Question/Answer         | Balafon (Hot Marimba)<br>Crunchy(Hot Marimba)<br>Rip! (Hot Marimba)<br>Rocka My Soul (Get America Singing Again)                 | Ostinati Patterns<br>Rhythm Exercises           |
| Week 14                            | Syncopation<br>Murray Ostinato Exercises<br>Mallet exercises in the Murray                              | Balafon (Hot Marimba)<br>Crunchy(Hot Marimba)<br>Swing Low Sweet Chariot                                                         | Rhythm Exercises                                |
| Week 15                            | Polyrhythms<br>Murray Ostinato Exercises<br>Mallet exercises in the Murray                              | Balafon (Hot Marimba)<br>Crunchy(Hot Marimba)<br>Rip! (Hot Marimba)<br>He's Got the Whole World                                  | Rhythm Exercises                                |
| Week 16                            | Ensemble Accuracy<br>Murray Ostinato Exercises<br>Mallet exercises in the Murray                        | Reviewed Pieces: Balafon, Crunchy, Swing Low Sweet Chariot, Rip!<br>New Piece: Amazing Grace(Traditional)                        | Rhythm Exercises                                |
| <b>Music Listening Instruction</b> | <b>Topic/Content</b>                                                                                    | <b>Pieces for Listening</b>                                                                                                      | <b>Homework Sheets</b>                          |
| Week 1                             | Hoffer- Chapter 1-3<br>Music Listening<br>Rhythm<br>Melody/Harmony                                      | Copland- "Hoedown" from Rodeo<br>Rutter- Open Thou Mine Eyes<br>Bizet- L'Arlesienne, Suite No.2<br>Copland- Simple Gifts         | HW-<br>Chapter 1-3<br>Questions for Completion  |
| Week 2                             | Hoffer- Chapter 4-6<br>Time/Dynamics<br>Orchestra Instruments<br>Other Musical Instruments              | Rodrigo- Concierto de Aranjuez, 2 <sup>nd</sup> Movt.<br>Britten- Young Person's Guide to Orchestra<br>Ave Maria<br>Gospel Choir | HW-<br>Chapters 4-5<br>Questions for Completion |
| Week 3                             | Chapter 7-9<br>Early Western Music and Medieval Music, and Renaissance                                  | Dies Irae<br>Hildegard of Bingen<br>Perotin- Alleluia<br>Machaut                                                                 | HW-<br>Chapters 7-9<br>Questions for Completion |

|                    |                                                                                            |                                                                                                                                                                                         |                                                      |
|--------------------|--------------------------------------------------------------------------------------------|-----------------------------------------------------------------------------------------------------------------------------------------------------------------------------------------|------------------------------------------------------|
| Week 3<br>(Cont'd) |                                                                                            | Estampie<br>Josquin de Prez- Kyrie<br>Palestrina- Sicut Cervus<br>Weelkes – As Vesta Was<br>Descending                                                                                  |                                                      |
| Week 4             | Chapter 10-11 Baroque Music                                                                | Handel- Messiah<br>Bach – Chorales<br>Bach- Zion Hears the Watchmen                                                                                                                     | HW- Chapters<br>10-11<br>Questions for<br>Completion |
| Week 5             | Chapters 12-14<br>Opera in Baroque Period<br>Instrumental Music in the<br>Baroque Period   | Monteverdi<br>Dido's Lament<br>Pachelbel Canon in D<br>Handel-Water Music<br>Corelli- Trio Sonata<br>Bach Brandenburg Concerto No.<br>5<br>Vivaldi- Spring                              | HW- Chapters<br>12-14<br>Questions for<br>Completion |
| Week 6             | Chapter 15-18<br>Classicism and Classical Music<br>Sonata Form/Concerto<br>Classical Opera | Mozart- Symphony No. 40<br>Mozart- Piano Concerto No. 21<br>Haydn- Concerto for Trumpet<br>Mozart- Don Giovanni                                                                         | HW- Chapters<br>15-18<br>Questions for<br>Completion |
| Week 7             | Chapter 19-21<br>Chamber Music<br>Piano Sonatas<br>The Symphony and Beethoven              | Hadyn- Emperor String Quartet<br>Mozart- Piano Sonata No.11<br>Beethoven- Piano Sonata No. 8 –<br>Pathetique<br>Beethoven- Symphony No. 5                                               | HW- Chapters<br>19-21<br>Questions for<br>Completion |
| Week 8             | Chapter 22-24<br>Romance and Romanticism<br>Romantic Piano Music                           | Schubert- Der Erikonig<br>Mendelssohn- Concerto for Violin<br>in E minor<br>Chopin- Nocturne in Db Major<br>Liszt- La Campanella<br>Clara Schumann- Scherzo                             | HW- Chapters<br>22-24<br>Questions for<br>Completion |
| Week 9             | Chapter 25-26<br>Program and Ballet Music<br>Romantic Opera                                | Berlioz- Symphonie Fantastique<br>Tchaikovsky- Waltz of the<br>Flowers<br>Verdi- excerpt from Rigoletto<br>Puccini- La Boheme Act 1<br>Wagner- Immolation Scene                         | HW- Chapters<br>25-26<br>Questions for<br>Completion |
| Week 10            | Chapter 27-28<br>Late Romantic Music<br>Nationalism                                        | Brahms- Symphony No. 4 in E<br>minor, Dvorak- American Quartet<br>Tchaikovsky- Symphony No. 4 in F<br>minor, Mussorgsky- Coronation<br>scene from Boris Godunov,<br>Smetana- The Moldau | HW- Chapters<br>27-28<br>Questions for<br>Completion |
|                    |                                                                                            |                                                                                                                                                                                         |                                                      |

|         |                                                                               |                                                                                                                                                                                                                                 |                                                       |
|---------|-------------------------------------------------------------------------------|---------------------------------------------------------------------------------------------------------------------------------------------------------------------------------------------------------------------------------|-------------------------------------------------------|
| Week 11 | Chapter 29-31<br>Music in the 20 <sup>th</sup> Century<br>Impressionism       | Debussy- Claire de Lune<br>Ravel- Daphnis and Chloe, Suite 2<br>Rachmaninoff –Rhapsody on a<br>Theme of Paganini<br>Bartok- Concerto for Orchestra<br>Villa Lobos- Aria from Bachianas<br>Brasileiras, Britten- Dies Irae       | HW- Chapters<br>29-31<br>Questions for<br>Completion  |
| Week 12 | Chapter 32-33<br>Expressionism and Primitivism<br>Neoclassicism and Tone Row  | Berg- Wozzeck<br>Stravinsky- The Rite of Spring<br>Hindemith- Kleine Kammermusik<br>Op. 24, No.2<br>Schoenberg- Variations for<br>Orchestra<br>Webern- Five Pieces for<br>Orchestra, Op. 10                                     | HW- Chapters<br>32-33<br>Questions for<br>Completion  |
| Week 13 | Chapter 34-35<br>New Sounds and New Techniques<br>American Music              | Varese- Poem Electronique<br>Hovhanness- And God Created<br>Great Whales<br>Sousa- The Stars and Stripes<br>Forever<br>Ives- Symphony No. 2                                                                                     | HW- Chapters<br>34- 35<br>Questions for<br>Completion |
| Week 14 | Chapter 36-37<br>Concert Music from 1920<br>Popular Music and Jazz until 1950 | Copland – Appalachian Spring<br>Zwiliich- Concerto Grosso<br>Adams-Short Ride in a Fast<br>Machine<br>Joplin- Maple Leaf Rag<br>Smith- Lost Your Head Blues<br>Armstrong-Come Back Sweet<br>Papa<br>Ellington- Take the A Train | HW- Chapters<br>36-37<br>Questions for<br>Completion  |
| Week 15 | Chapter 38-39<br>Popular Music since 1950<br>Music for Stage and Film         | Brubek- Blue Rondo a la Turk<br>Bernstein- West Side Story<br>(Tonight)<br>Gershwin- Porgy and Bess<br>(Summertime)<br>Hermann – music from Psycho<br>(Prelude, Murder)                                                         | HW- Chapters<br>38-39<br>Questions for<br>Completion  |
| Week 16 | Chapter 40-43<br>Folk and Ethnic Music- Europe,<br>Americas, Africa, and Asia | English ballad- Barbara Allen<br>Mexican song- Sones de Hausteca<br>Iran- Segah, India- Ragas, Japan-<br>Hakusen No, Bali- Gender Wajang                                                                                        | HW- Chapters<br>40-43<br>Questions for<br>Completion  |
